# Supplementary material for: Optimization of the Split-Spinach Aptamer for Monitoring Nanoparticle Assembly Involving Multiple Contiguous RNAs
Source: PubMed Central journal article supplement (PMC6474029; doi:10.3390/nano9030378), 2019-03-06
Supplement: nanomaterials-09-00378-s001.pdf [file nanomaterials-09-00378-s001.pdf]

# Optimization of the Split-Spinach Aptamer for Monitoring Nanoparticle Assembly Involving Multiple Contiguous RNAs

Jack M. O'Hara <sup>1</sup>, Dylan Marashi <sup>1</sup>, Sean Morton <sup>1</sup>, Luc Jaeger <sup>2</sup> and Wade W. Grabow <sup>1,\*</sup>

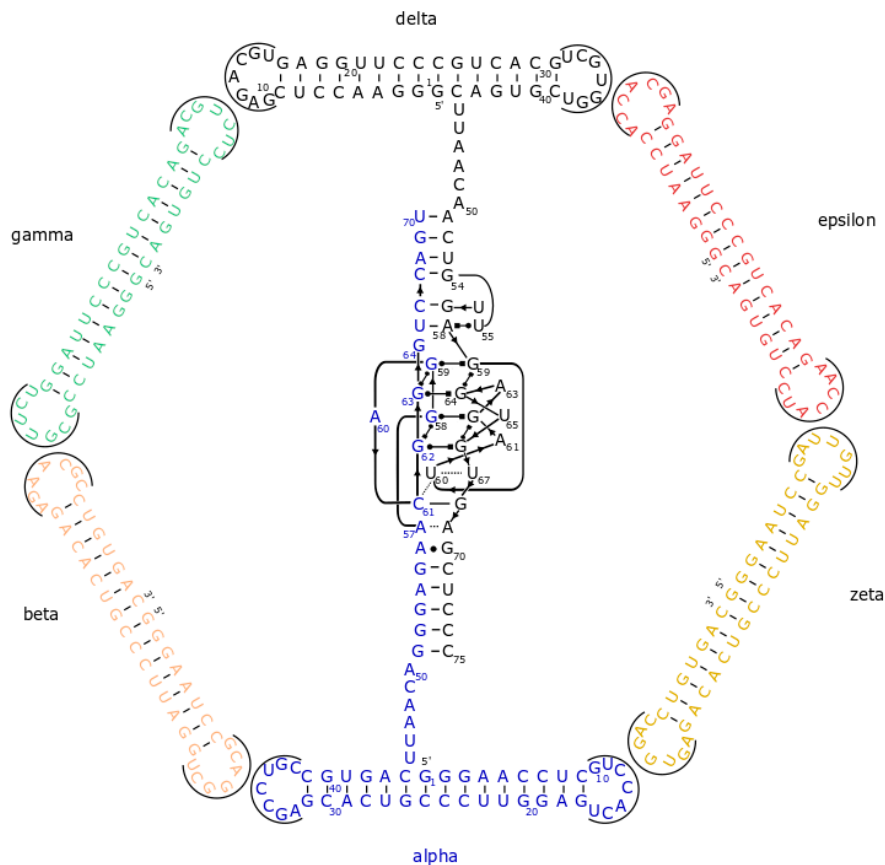

**Figure S1.** 2D sequences associated with the 5bp/6bp/6nt version of the split-aptamer integrated nanoring system.

## Full-length Spinach control

5'-GGGAGAAGGACGGGUCCAGUGCGAAACA CGCACUGUUGAGUAGAGUGUGAGCUCCC-3'

## Ring Struts

beta

5'-GGGAAcCuCGCAGGCUGaGgUUCCCGUCACGAGAACGCCGUGAC-3'

gamma

5'-GGGAAcCuCGCGUUCUGaGgUUCCCGUCACGACGUCUCCGUGAC-3'

epsilon

5'-GGGAAcCuCACCACGAGaGgUUCCCGUCACGAACCAUCCGUGAC-3'

zeta

5'-GGGAACcCuCGAUGGUUGaGgUUCcCGUCACGAGUGGACCGUGAC-3'

### Stem/linker exploration

#### 5bp/6bp/6nt version of the split-aptamer

5'GGGAACCUCGUCCACUGAGGUUCCCGUCACGAGCCUGCCGUGACUUAACAGGGAGAAGGACGGGUCCA  
GU3'  
5'GGGAACCUCGAGACGUGAGGUUCCCGUCACGUCGUGGUCGUGACUUAACAACUGUUGAGUAGAGUGU  
GAGCUCCC3'

#### 5bp/7bp/6nt version of the split-aptamer

5'  
GGGAACCUCGUCCACUGAGGUUCCCGUCACGAGCCUGCCGUGACUUAACAGGGAGAAGGACGGGUCCA  
U-3'  
5'  
GGGAACCUCGAGACGUGAGGUUCCCGUCACGUCGUGGUCGUGACUUAACACACUGUUGAGUAGAGUGU  
GAGCUCCc-3'

#### 5bp/7bp/5nt version of the split-aptamer

5'  
GGGAACCUCGUCCACUGAGGUUCCCGUCACGAGCCUGCCGUGACUUAACAGGGAGAAGGACGGGUCCA  
-3'  
5'  
GGGAACCUCGAGACGUGAGGUUCCCGUCACGUCGUGGUCGUGACUUAACACACUGUUGAGUAGAGUGU  
AGCUCCc-3'

### alpha-strands tested

GGG-AGU  
5'GGGAACCUCGUCCACUGAGGUUCCCGUCACGAGCCUGCCGUGACUUAACAGGGAGAAGGACGGGUCCA  
GU3'

GGA-AGU  
5'GGGAACGUCGUCCACUGACCGUUCCCGUCACGAGCCUGCCGUGACUUAACAGGAGAAGGACGGGUCCA  
GU3'

GGG-GGU  
5'GGGAACGUCGUCCACUGACCGUUCCCGACACCAGCCUGCCGUGUCUUAACAGGGAGAAGGACGGGUCCG  
GU3'

GGG-AGU.1  
5'GGGAACCUCGUCCACUGAGGUUCCCGUCACGAGCCUGCCGUGAC          GGGAGAAGGACGGGUCC  
AGU3'

GGG-AG\_.1  
5'GGGAACCUCGUCCACUGAGGUUCCCGUCACGAGCCUGCCGUGAC          GGGAGAAGGACGGGUCC  
AG3'

GGG-AGC.2  
5'GGGAACCUCGUCCACUGAGGUUCCCGUCACGAGCCUGCCGUGACUUAACUGGGAGAAGGACGGGUCCA  
G-3'

GGG-AGC.3

5'GGGAACCUCGUCCACUGAGGUUCCCGUCACGAGCCUGCCGUGACUAAUCGGGAGAAGGACGGGUCCA  
G 3'

GG-AGC.1

5'GGGAACCUCGUCCACUGAGGUUCCCGUCACGAGCCUGCCGUGAC GGGAGAAGGACGGGUCCA  
AG 3'

CCU-AGC

5'  
GGGAACGUCCACUGACGUUCCCGUCACGAGCCUGCCGUGACUAAACA AGAAGGACGGGUCCA  
C 3'

CCC-GGU

5'  
GGGAACGUCCACUGACGUUCCCGUCACGAGCCUGCCGUGACUAAACA CCCAGAAGGACGGGUCCA  
U 3'

CCC-AGU

5'  
GGGAACGUCCACUGACGUUCCCGUCACGAGCCUGCCGUGACUAAACA AGAAGGACGGGUCCA  
U 3'

CCU-AGU

5'GGGAACGUCCACUGACGUUCCCGUCACGAGCCUGCCGUGACUAAACA AGAAGGACGGGUCCA  
GU 3'

CCU-AGU

5'  
GGGAACGUCCACUGACGUUCCCGUCACGAGCCUGCCGUGACUAAACA AGAAGGACGGGUCCA  
U 3'

**delta-strands tested**

ACU-CCC5'

GGGAACCUCGAGACGUGAGGUUCCCGUCACGUCGUGGUCGUGACUAAACAACUGUUGAGUAGAGUGU  
AGCUCCC3'

ACU-UCC5'

GGGAACCUCGAGACGUGAGGUUCCCGUCACGUCGUGGUCGUGACUAAACAACUGUUGAGUAGAGUGU  
AGCUCC3'

ACU-CCC.1

5'GGGAACCUCGAGACGUGAGGUUCCCGUCACGUCGUGGUCGUGAC ACUGUUGAGUAGAGUGU  
GAGCUCCC 3'

ACU-UCC.1

5'GGGAACCUCGAGACGUGAGGUUCCCGUCACGUCGUGGUCGUGAC ACUGUUGAGUAGAGUGU  
GAGCUCC 3'

ACC-UCC.1

5'GGGAACCUCGAGACGUGAGGUUCCCGUCACGUCGUGGUCGUGAC AC GUUGAGUAGAGUGU  
GAGCUCC 3'

ACC-CCC.1

5'GGGAACCUCGAGACGUGAGGUUCCCGUCACGUCGUGGUCGUGAC AC GUUGAGUAGAGUGU  
GAGCUCCC 3'

GCU-CCC.1  
5'GGGAACCUCGAGACGUGAGGUUCCCGUCACGUCGUGGUCGUGACACUGUUGAGUAGAGUGU  
GAGCUCCC-3'

GCU-CC\_1  
5'GGGAACCUCGAGACGUGAGGUUCCCGUCACGUCGUGGUCGUGACACUGUUGAGUAGAGUGU  
GAGCUCC-3'

ACU-CC\_1  
5'GGGAACCUCGAGACGUGAGGUUCCCGUCACGUCGUGGUCGUGACACUGUUGAGUAGAGUGU  
GAGCUCC-3'

ACU-CC\_1  
5'GGGAACCUCGAGACGUGAGGUUCCCGUCACGUCGUGGUCGUGACACUGUUGAGUAGAGUGU  
GAGCUCC-3'

ACU-GGG.2  
5'GGGAACCUCGAGACGUGAGGUUCCCGUCACGUCGUGGUCGUGACACUGUUGAGUAGAGUGU  
GAGCUGGG-3'

ACU-AGG.2  
5'GGGAACCUCGAGACGUGAGGUUCCCGUCACGUCGUGGUCGUGACACUGUUGAGUAGAGUGU  
GAGCUAGG-3'

GCU-GGG.2  
5'GGGAACCUCGAGACGUGAGGUUCCCGUCACGUCGUGGUCGUGACACUGUUGAGUAGAGUGU  
GAGCUGGG-3'

GUU-GGG.2  
5'GGGAACCUCGAGACGUGAGGUUCCCGUCACGUCGUGGUCGUGACACUGUUGAGUAGAGUGU  
GAGCUGGG-3'

GUU-AGG.2  
5'GGGAACCUCGAGACGUGAGGUUCCCGUCACGUCGUGGUCGUGACACUGUUGAGUAGAGUGU  
GAGCUAGG-3'

GCU-GG\_2  
5'GGGAACCUCGAGACGUGAGGUUCCCGUCACGUCGUGGUCGUGACACUGUUGAGUAGAGUGU  
GAGCUGG-3'

GCU-AGG.3  
5'GGGAACCUCGAGACGUGAGGUUCCCGUCACGUCGUGGUCGUGACACUGUUGAGUAGAGUGU  
GAGCUAGG-3'

**Table S1.** Complete list of sequences used in study. Green highlights represent the portion of the Spinach aptamer that was appended to the alpha strand of the nanoring. Yellow highlights represent the portion of the aptamer appended to the delta strand. Light blue highlights show the kissing loop sequences associated with the programmable nanoring.

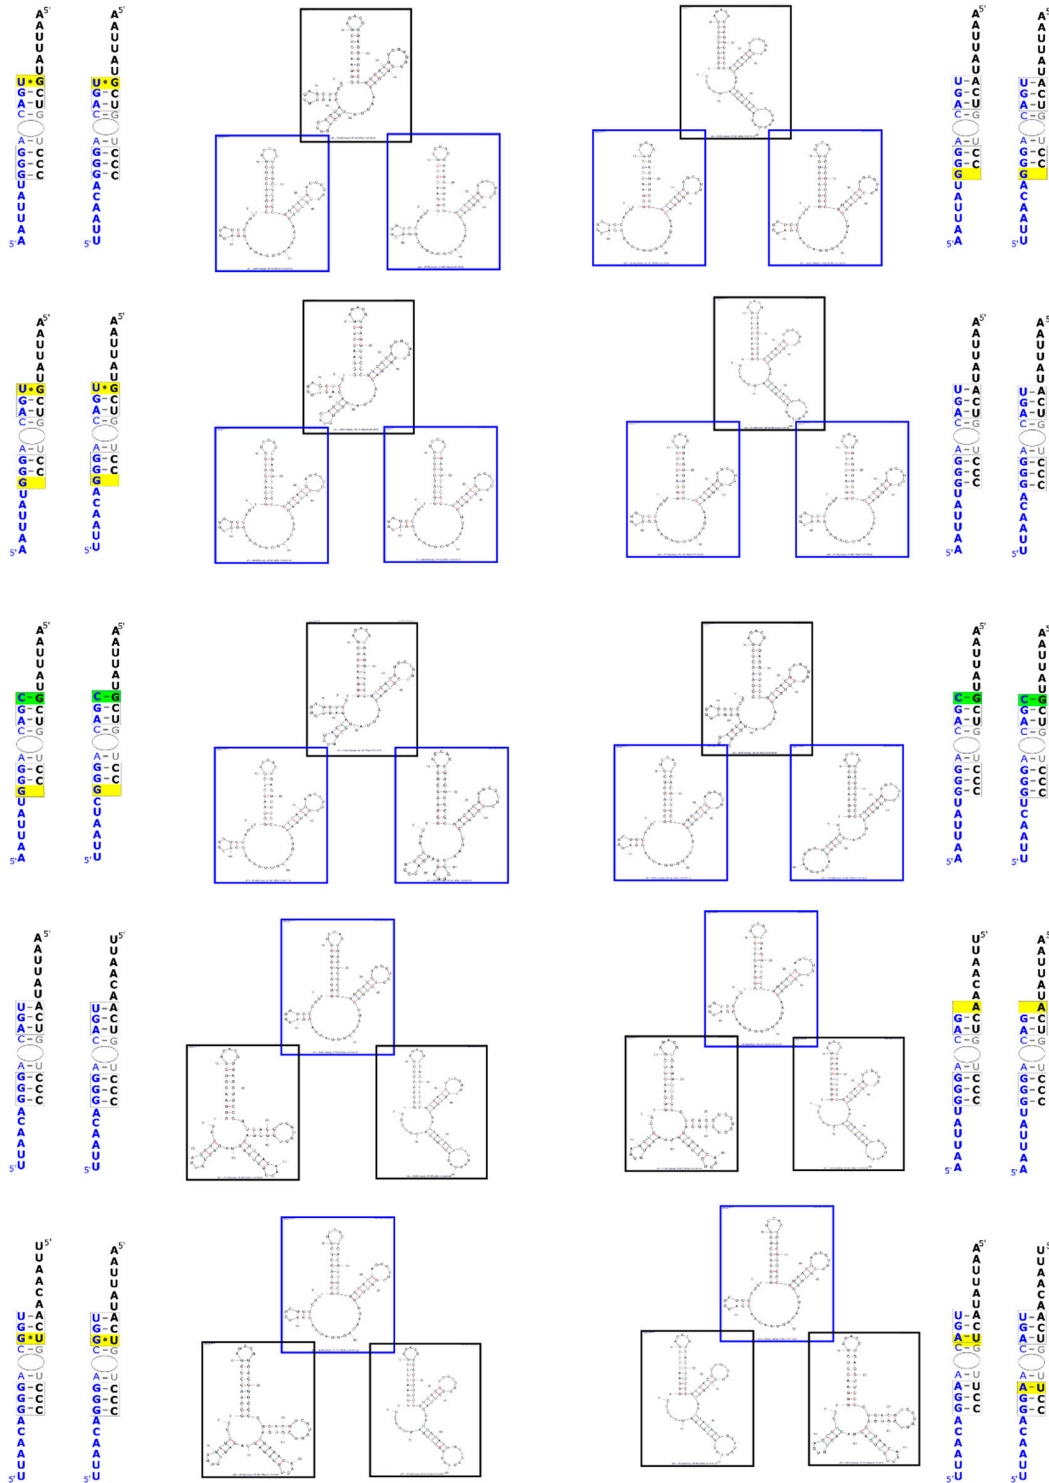

**Figure S2.** Predicted secondary structures for individual strands based on linker variants. The 2D structures were generated using the mfold server.1 The two hairpins of 9- and 6-bp represent the struts of the nanoring. The remaining portion represent the most stable predicted secondary structure of the linker and split-apptamer region. The predicted structures were evaluated to determine whether the linker prevented or facilitated additional secondary structure to sequester the aptamer strand.
